# Supplementary material for: Landscape-scale prediction of spruce budworm-induced host mortality using machine learning
Source: Research Square preprint supplement (doi:10.21203/rs.3.rs-7755163/v1), 2025-10-30

Landscape-scale prediction of spruce budworm-induced host mortality using machine learning.

Rindra Fanomezana Ranaivomanana12*, Mathieu Bouchard13, Élise Filotas14

1 Center for Forest Research, Université du Québec à Montréal UQAM, Biological Sciences Pavilion, 141 Président-Kennedy Avenue, Montréal, QC H2X 1Y4, Canada.

2 Institute of Environmental Sciences, Université du Québec à Montréal UQAM, Président-Kennedy Pavilion, 201 Président-Kennedy Avenue, Montréal, QC H2X 3Y7, Canada.

3 Department of Wood and Forest Sciences, Abitibi-Price Pavilion, Université Laval, 2405 de la Terrasse Street, Québec, QC G1V 0A6, Canada.

4 Department of Science and Technology, TÉLUQ, 5800, Saint-Denis Street, Montréal, QC H2S 3L5, Canada.

*Corresponding author: rindra.fanomezana@gmail.com, eb191970@ens.uqam.ca, (514)701-7974

**Supplementary materials**

**Fig. S1** Predictor variables importance for all machine learning algorithms


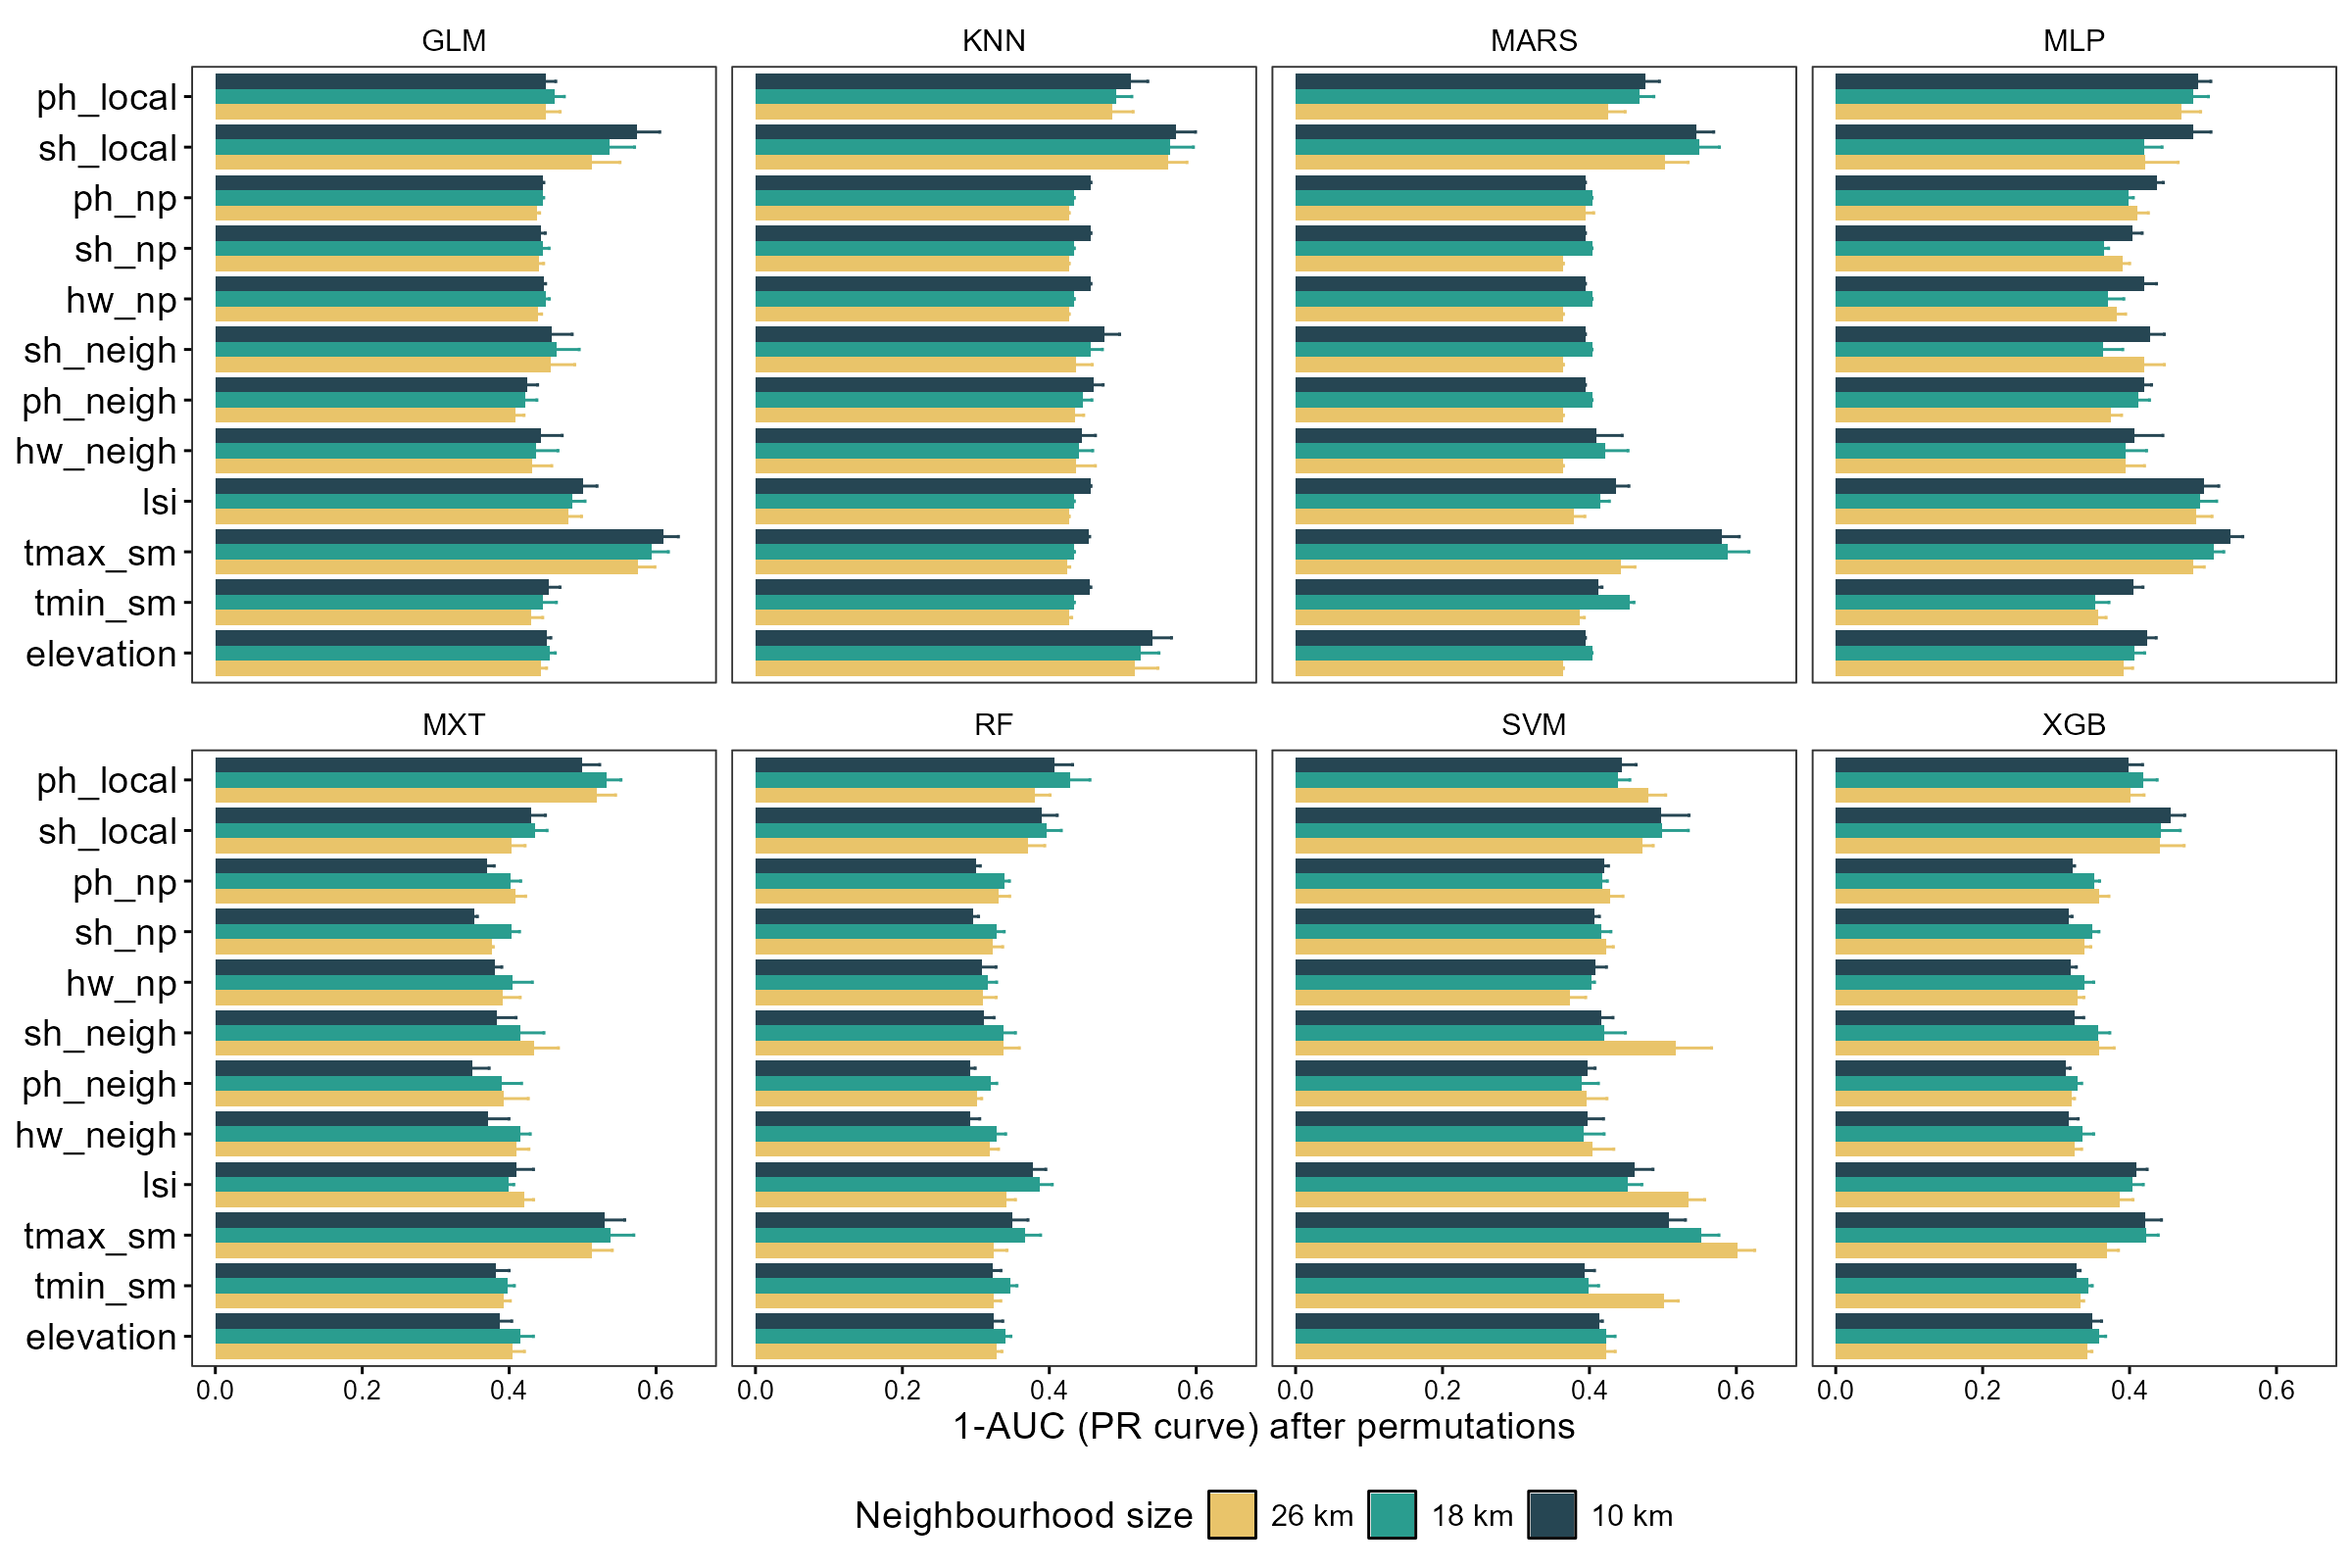


**Fig. S2** Partial dependence plots for all variables and all machine learning algorithms


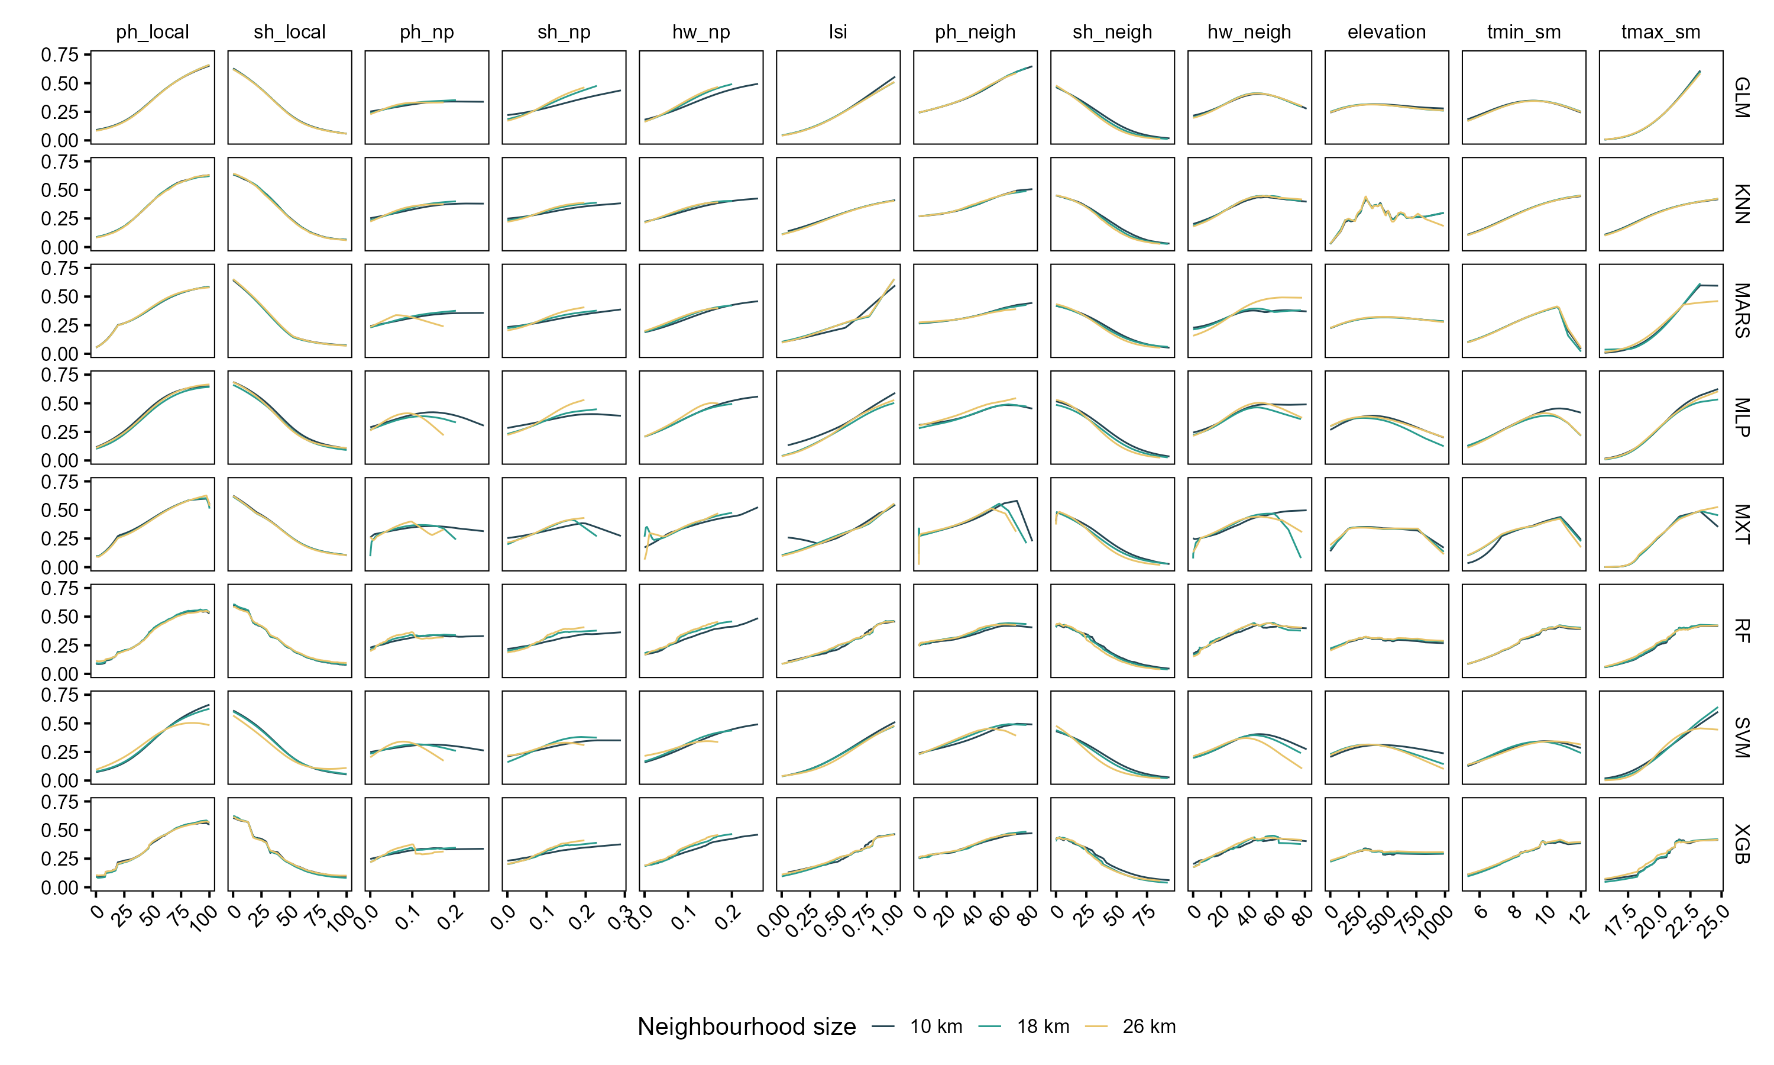

Supplement: Supplementary file 1 [file 489a8cd04dc16755b5566625.docx]
